# Supplementary material for: Real-time tone mapping on GPU and FPGA
Source: Springer Nature journal article supplement (doi:10.1186/1687-5281-2012-1), 2012-02-15

1-byte data

4-byte data

4 data/hebra  
4K data/warp

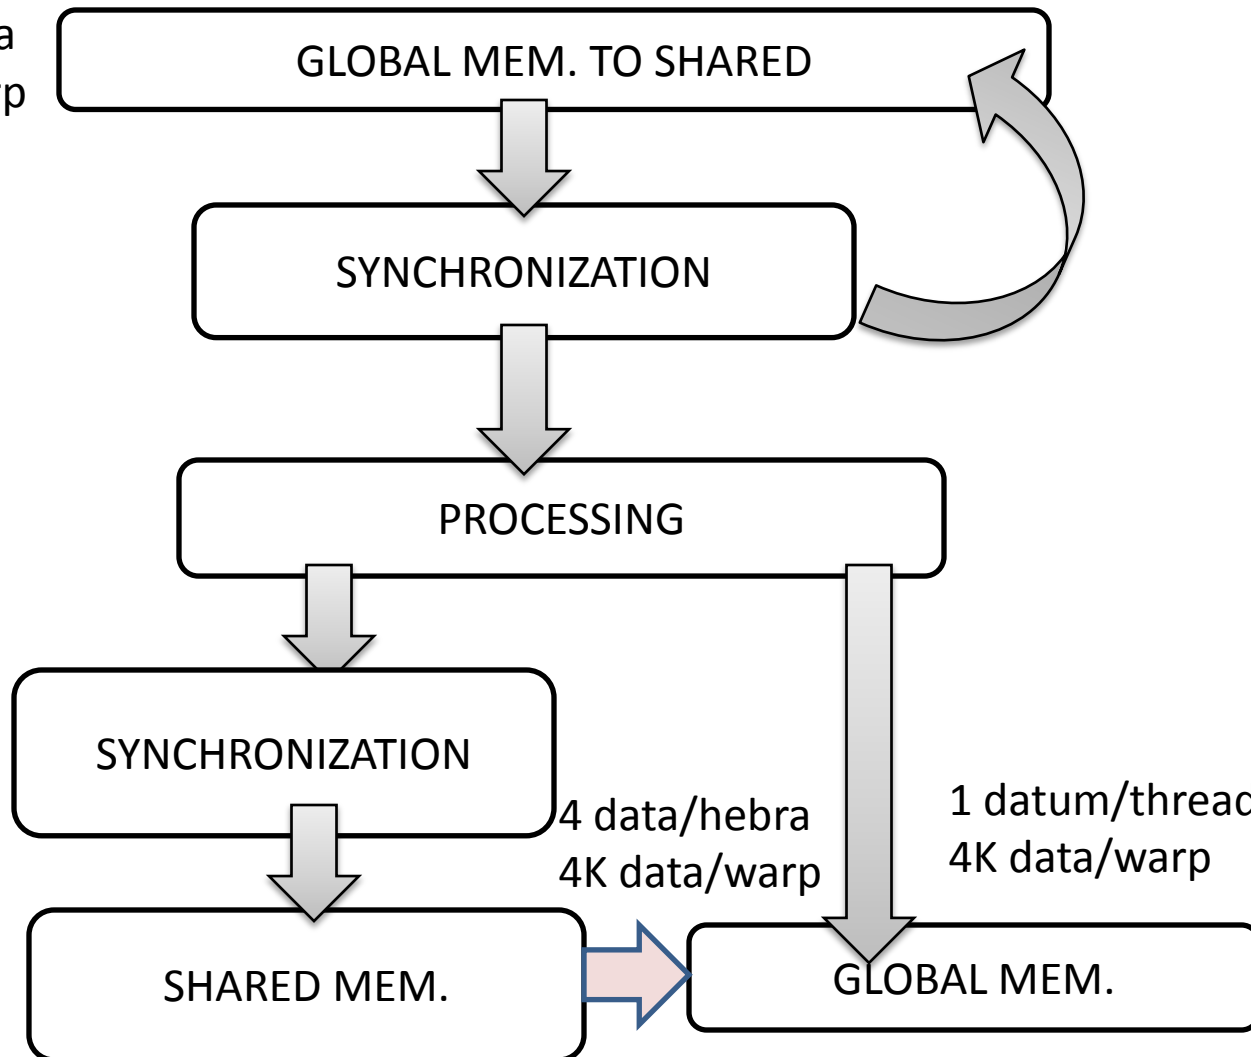

Supplement: 13640_2011_26_MOESM3_ESM.pdf [file 13640_2011_26_MOESM3_ESM.pdf]
